1 **Optimization of cerebrospinal fluid microbial metagenomic sequencing diagnostics**

2

3 Josefin Olausson<sup>1</sup>, Sofia Brunet<sup>1</sup>, Diana Vracar<sup>1,2</sup>, Yarong Tian<sup>2</sup>, Sanna Abrahamsson<sup>2</sup>, Sri

4 Harsha Meghadri<sup>1</sup>, Per Sikora<sup>3</sup>, Maria Lind Karlberg<sup>4</sup>, Hedvig Engström Jakobsson<sup>1\*</sup>, Ka-Wei

5 Tang<sup>1,2</sup>

6

7 <sup>1</sup> Department of Clinical Microbiology, Sahlgrenska University Hospital, Region Västra

8 Götaland, Gothenburg, Sweden

9 <sup>2</sup> Wallenberg Centre for Molecular and Translational Medicine, Department of Infectious

10 Diseases, Institute of Biomedicine, University of Gothenburg, Gothenburg, Sweden

11 <sup>3</sup> Clinical Genomics Gothenburg, Science for Life Laboratories, Gothenburg, Sweden

12 <sup>4</sup> Department of Microbiology, Public Health Agency of Sweden, Solna, Sweden

13

14 JO: [josefin.olausson@gu.se](mailto:josefin.olausson@gu.se)

15 SB: [sofia.brunet@gu.se](mailto:sofia.brunet@gu.se)

16 YT: [yarong.tian@gu.se](mailto:yarong.tian@gu.se)

17 DV: [diana.vracar@gu.se](mailto:diana.vracar@gu.se)

18 SA: [sanna.abrahamsson@gu.se](mailto:sanna.abrahamsson@gu.se)

19 SHM: [harshameghadri@gu.se](mailto:harshameghadri@gu.se)

20 PS: [per.sikora@gu.se](mailto:per.sikora@gu.se)

21 MLK: [maria.lind.karlberg@folkhalsomyndigheten.se](mailto:maria.lind.karlberg@folkhalsomyndigheten.se)

22 KWT: [kawei.tang@gu.se](mailto:kawei.tang@gu.se)

23 HEJ: [hedvig.jakobsson@gu.se](mailto:hedvig.jakobsson@gu.se) \*Corresponding author

24 Short title: Metagenomic sequencing of cerebrospinal fluid

25

26

27 **Abstract**

28 **Background**

29 Infection in the central nervous system is a severe condition associated with high morbidity  
30 and mortality. Despite ample testing, the majority of encephalitis and meningitis cases remain  
31 undiagnosed. Metagenomic sequencing of cerebrospinal fluid has emerged as an unbiased  
32 approach to identify rare microbes and novel pathogens. However, several major hurdles  
33 remains, including establishment of individual limits of detection, removal of false positives  
34 and implementation of universal controls.

35 **Results**

36 Twenty-one cerebrospinal fluid samples, in which a known pathogen had been positively  
37 identified by available clinical techniques, were subjected to metagenomic DNA sequencing  
38 using massive parallel sequencing. Fourteen samples contained minute levels of Epstein-Barr  
39 virus. Calculation of the detection threshold for each sample was made using total leukocyte  
40 content in the sample and environmental contaminants found in bioinformatic classifiers.  
41 Virus sequences were detected in all ten samples, in which more than one read was expected  
42 according to calculations. Conversely, no viral reads were detected in seven out of eight  
43 samples, in which less than one read was expected according to calculations. False positive  
44 pathogens of computational or environmental origin were readily identified, by using a  
45 commonly available cell control. For bacteria additional filters including a comparison  
46 between classifiers removed the remaining false positives and alleviated pathogen  
47 identification.

48 **Conclusions**

49 Here we show a generalizable method for detection and identification of pathogen species  
50 using metagenomic sequencing. The sensitivity for each sample can be calculated using the  
51 leukocyte count and environmental contamination. The choice of bioinformatic method

52 mainly affected the efficiency of pathogen identification, but not the sensitivity of detection.  
53 Identification of pathogens require multiple filtering steps including read distribution,  
54 sequence diversity and complementary verification of pathogen reads.

55

## 56 **Keywords**

57 Metagenomics, Cerebrospinal fluid, Pathogen classification, PaRCA, Epstein-Barr virus

58

## 59 **Background**

60 Infections in the central nervous system (CNS) are severe and despite extensive  
61 microbiological diagnostic analysis a causative pathogen cannot be identified in many of the  
62 cases. A majority of CNS infections are caused by viruses, such as herpes simplex virus 1  
63 (HSV1), varicella zoster virus (VZV or human herpesvirus 3) and enterovirus [1, 2]. Among  
64 CNS infections, *Streptococcus pneumoniae* and *Neisseria meningitidis* are the most common  
65 pathogens, while fungal or parasitic meningitis CNS infections are less common [3]. Epstein-  
66 Barr virus (EBV) has been implicated in recurrent meningitis and chronic encephalitis [4].  
67 However, due to the high prevalence of EBV and its ability to remain latent in B-lymphocytes  
68 after primary infection and its role in tumorigenesis, assessing the clinical relevance of EBV  
69 DNA detected in cerebrospinal fluid (CSF) is difficult and presence of EBV is often  
70 considered to be an benign incidental finding [5, 6].

71

72 Current microbiological diagnostic methods include cultivation and nucleic acid detection of  
73 CSF, which are restricted to prior knowledge of the putative causing agent. Cultivation can  
74 detect a wide range of microorganisms, however, it is limited to viable and culturable  
75 pathogens. In contrast, nucleic acid detection is rapid and highly sensitive, but constrained to  
76 genetically conserved regions of known pathogens. Metagenomic sequencing using massive  
77 parallel sequencing, has the capability to discern multiple species and identify unknown

78 species in samples. In metagenomics, the total nucleic acid present in the clinical sample is  
79 sequenced, thus provides an unbiased tool to diagnose infections and unknown species in  
80 samples [7-12].

81

82 Currently there is no standard for metagenomic sequencing in a clinical setting and the  
83 technique is still faced with some major challenges [13]. Contrary to PCR, the sensitivity in  
84 metagenomic sequencing is dependent on the fraction of pathogen sequences in the total  
85 sequencing library. Furthermore, laboratory contaminations detected in sequencing have been  
86 shown to differ greatly between laboratories and be dependent on the input biomass [14, 15].  
87 Nucleic acid derived from the host and environmental contaminants must therefore be taken  
88 into account. Previous studies have calculated the sensitivity by using dilution of an  
89 exogenous pathogen into a known quantity of host background. However, this does not take  
90 into account the variability of clinical samples nor does it provide any guidance on how the  
91 sensitivity of each sample should be calculated.

92

93 Bioinformatic pathogen identification is a second major obstacle. Several publically available  
94 bioinformatic tools for classification are available, such as Centrifuge, Kraken and PathSeq  
95 [16-18]. Two conceptual different methods are frequently used, alignment of single reads (e.g.  
96 BLAST), or assemblies (k-mers), against pathogen databases. The list of pathogens generated  
97 by these applications are often long and requires exhaustive examinations in order to discern  
98 the true pathogen from bioinformatic misclassification and environmental contaminations.  
99 Criteria for identifying the causative pathogen include sequences disseminated throughout the  
100 microbial genome of the proposed pathogen, a threshold for number of pathogen reads in  
101 relation to total number of reads, and confirmation using several alignment algorithms have

102 been suggested to increase the specificity [19, 20]. Each laboratory does however apply their  
103 own criteria.

104

105 We investigated the robustness of microbial metagenomics for clinical diagnostics of CNS-  
106 infections. To evaluate the diagnostic performance of the method, 21 CSF samples with  
107 variable levels of known pathogens were sequenced with the aim to identify factors important  
108 for calculating sensitivity. Also, four different taxonomic classifiers were assessed for their  
109 efficiency to identify pathogens as well as the number of false positive pathogens identified.  
110 Two commonly available cell lines were implemented as a positive and negative control to  
111 support the removal of environmental contaminants and bioinformatic misclassifications.  
112 Pathogen detection in DNA metagenomic sequencing in CSF is mainly limited by the  
113 leukocyte count which affects the sensitivity and bioinformatic missclassifications which  
114 affects the efficiency of pathogen identification.

115

## 116 **Results**

117 We implemented a metagenomic DNA sequencing methodology to unbiasedly detect  
118 microbial species in CSF samples from patients with CNS symptoms in which a pathogen or  
119 EBV had been detected (Additional Table 1). Samples positively identified with pathogen-  
120 specific quantitative PCR (qPCR), 16S rRNA gene sequencing or bacterial/mycotic culture in  
121 CSF were included. Different pathogen types and variation of viral loads were chosen. CSF  
122 samples containing low levels of EBV were chosen to establish the sensitivity of the method.  
123 DNA from each sample was extracted and fragmented before library preparation and  
124 sequenced using massive parallel sequencing. Datasets were processed using five  
125 bioinformatic tools (Additional Figure 1).

126

127 **Bioinformatic classifiers**

128 Four bioinformatic classifiers were included, Kraken2, Centrifuge, our in-house developed  
129 PaRCA (Pathogen detection for Research and Clinical Applications) and CosmosID.  
130 CosmosID was tested mainly for its ability to generate concise pathogen lists, but the format  
131 of the platform prevented a detailed analysis of the raw data and was therefore not included in  
132 all comparisons in the manuscript. The four bioinformatic classifiers diverged with regards to  
133 fraction of processed reads (from 85%-100%, Additional Table 2-3). However, the ability to  
134 identify the primary pathogen was similar comparing the classifiers.

135

136 **Sensitivity**

137 Initially, three CSF samples (Sample 1-3) with high virus load of herpesvirus were analyzed.  
138 HSV1 and VZV were detected by all bioinformatic classifiers (Table 1). In sample 1, HSV1  
139 was positively identified at  $1 \times 10^4$  genome equivalents per milliliter (Geq/ml) using qPCR.  
140 The sequencing library consisting of more than 15 million reads contained 6.2-7.2 HSV1  
141 reads per million sequences analyzed (parts per million; ppm). The following two samples  
142 originated from patients with similar values of VZV DNA levels quantified by qPCR (1.9 and  
143  $3.9 \times 10^5$  Geq/ml). Despite equivalent levels a ten-fold difference in detected VZV reads was  
144 observed between sample two (15-16 ppm) and sample three (135-147 ppm). Sample 2  
145 contained  $272 \times 10^6$  white blood cells (WBC) per liter compared with sample 3 which  
146 contained  $17 \times 10^6$  WBC per liter (Table 1). We hypothesized that the difference in sensitivity  
147 was related to variations in leukocyte composition in the sample.

148 To further test the sensitivity, two CSF samples containing JC polyomavirus  
149 (JCV), a DNA virus with a relatively small genome, were processed. One sample contained  
150 high virus levels ( $1.9 \times 10^5$  Geq/ml) and the other low virus levels ( $4.3 \times 10^3$  Geq/ml) (Sample

151 4-5). JCV DNA was readily detected in both samples ranging from 1757-2096 ppm in sample  
152 4 and 40-57 ppm in sample 5.

153 In order to verify that the methodology was applicable for bacterial agents, we  
154 sequenced CSF from two patients with pneumococcal meningitis, diagnosed by cultivation  
155 and/or 16S rRNA gene Sanger sequencing (Sample 6-7). DNA from *Streptococcus*  
156 *pneumoniae* (*S. pneumoniae*) was classified with a range between 30,704-60,661 ppm  
157 (Sample 6), and 679-804 ppm (Sample 7). In addition to the bacterial samples, we included  
158 two CSF samples from patients with RNA viral enterovirus CNS infection (Sample 8-9). As  
159 expected, no DNA reads were identified. Enterovirus was, however, found using  
160 metagenomic RNA sequencing (Additional figure 2)

161 Samples with co-infections, where EBV was detected along with a primary  
162 infectious agent (Enterovirus sample 9, VZV sample 10-11 and *Cryptococcus sp.* sample 12),  
163 were analyzed. Neither the EBV nor the enterovirus was detected in sample 9. VZV and EBV  
164 was detected in sample 10, and only VZV was detected in sample 11. Neither yeast nor EBV  
165 DNA was detected in sample 12. The results were expected when the following equation  
166 was applied for calculating the sensitivity for each agent.

167 The theoretically expected number of pathogen reads was calculated according  
168 to pathogen genome size ( $G_P$ ), the diploid human genome size of 6.5 billion basepairs ( $G_H$ ),  
169 pathogen copy according to PCR per milliliter ( $C_P$ ), whole blood cell count per milliliter ( $C_H$ ),  
170 and adjusted according to the volume ( $V$ ), sequencing library size ( $L$ ) and mappability in  
171 percent ( $M$ ) to remove major contaminants.

172

$$Pathogen\ read = L / \left( \frac{C_H \times G_H \times V}{C_P \times G_P} \times M^{-1} \right)$$

173

174 Thus, the detection limit of a single read of a pathogen with a 1 million basepair genome in  
175 CSF with normal WBC count ( $5 \times 10^3$  per milliliter) using an input volume of 0.3 milliliter and  
176 >95% mappability require a sequencing library of approximately 10 million reads.

177 We included additional nine CSF samples with low levels of EBV DNA (50-  
178 2000 Geq/ml) (Sample 13-21). With the exception of sample 13 (patient diagnosed with CNS  
179 Hodgkin's lymphoma type Post-Transplant Lymphoproliferative Disorder), and sample 16,  
180 where EBV was considered the cause of the symptoms, the EBV findings were clinically  
181 interpreted as benign incidental findings i.e. not the causative agent for the symptoms of  
182 infection. The EBV DNA detected in the majority of samples is likely to originate from  
183 latently infected B-lymphocytes recruited into the CSF. Despite the limitations for absolute  
184 quantification using qPCR and the stochasticity of distribution of low level pathogen particles,  
185 with one exception the calculated reads correlated with the detected reads in the sequencing  
186 data (Table 1). In ten samples, more than 1 viral reads was expected and pathogen sequences  
187 were found in all samples (Additional Figure 3). In seven samples where less than 1 read was  
188 expected to be found, EBV reads were only detected in one dataset (sample 17). Sixteen  
189 copies of EBV per milliliter was detected in sample 17 using qPCR and 11 reads were  
190 detected using metagenomic sequencing even though 0.3 reads were expected. The  
191 discrepancy between the calculation and and sequencing results is most likely due to the  
192 stochastic distribution of the few viral particles in the sample. In sample 20, 0.99 reads were  
193 expected to be detected in the dataset and a single EBV-read was identified in two of the four  
194 classifiers (Kraken2 and Centrifuge). This read was further confirmed using BLAST. The  
195 WBC count in sample 18 was below the reference interval of the leukocyte cell counter and  
196 was therefore omitted.

197 All pathogen reads from PaRCA were mapped against the corresponding  
198 genome sequences using CLC genomics workbench (Figure 1a-e, Additional Figure 4). A



199 dispersed distribution of the reads to the corresponding genomes was observed for all  
200 samples, except sample 10, where 5 of the 7 VZV reads (1 overlapping read) originate from a  
201 repetitive region within the genome and is therefore expected to be detected at a higher rate,  
202 and the last 2 reads map to a downstream gene (no overlap) (Additional Figure 4d). Each  
203 sequencing library was subjected to BLAST using the respective reference pathogen genome.  
204 The variation of the absolute number pathogen reads comparing the different classifiers  
205 detected was lower than 25% (Table 1).

206 Qualitative and quantitative detection of a known pathogen can thus reproducibly be carried  
207 out using the different types of bioinformatic classifiers. Furthermore, an estimation of  
208 sensitivity for pathogens can be generated for each sample which can guide the clinician  
209 whether the sequencing depth is sufficient to find a certain type of pathogen (Additional Table  
210 4). Notably however, each classifier produced diverse quantities of false positive hits.

211 **Table 1.** Metagenomic sequencing pipeline results.

| Sample | Verified Pathogen | Clinical Method       | qPCR (Geq/ml)        | PaRC A (reads) | Kraken2 (reads) | Centrifuge (reads) | CosmosID (reads) | BLAST (reads) | Calculated reads | Range (ppm)   | Leukocytes (x10 <sup>6</sup> /l) |
|--------|-------------------|-----------------------|----------------------|----------------|-----------------|--------------------|------------------|---------------|------------------|---------------|----------------------------------|
| 1      | HSV1              | qPCR                  | 1.0x10 <sup>4</sup>  | 97             | 105             | 107                | 107              | 108           | 90               | 6.2-7.2       | 41                               |
| 2      | VZV               | qPCR                  | 3.9x10 <sup>5</sup>  | 213            | 219             | 223                | 211              | 213           | 365              | 14.9-16.0     | 272                              |
| 3      | VZV               | qPCR                  | 1.9x10 <sup>5</sup>  | 2,196          | 2,234           | 2,251              | 2,170            | 2,197         | 3,072            | 134.8-147.1   | 17                               |
| 4      | JCV               | qPCR                  | 1.9x10 <sup>5</sup>  | 23,766         | 24,018          | 24,190             | 22,318           | 23,847        | N/A              | 1,757-2,096   | N/A                              |
| 5      | JCV               | qPCR                  | 4.3x10 <sup>3</sup>  | 496            | 512             | 515                | 484              | 498           | N/A              | 39.8-57.1     | N/A                              |
| 6      | S.                | Cultivation/16S rRNA  | N/A                  | 766,74         | 699,662         | 575,646            | 701,304          | 643,083       | N/A              | 30,704-60,611 | 55                               |
| 7      | S. pneumoniae     | 16S rRNA qPCR         | N/A                  | 12,988         | 11,762          | 12,511             | 12,277           | 12,274        | N/A              | 679-804       | 1064                             |
| 8      | Enterovirus       | qPCR                  | 3.7x10 <sup>2</sup>  | -              | -               | -                  | -                | -             | 0.1              | Undet.        | 217                              |
| 9      | Enterovirus       | qPCR                  | 6.6x10 <sup>4</sup>  | -              | -               | -                  | -                | -             | N/A              | Undet.        | 95                               |
| 10     | EBV               | qPCR                  | 5.8x10 <sup>4</sup>  | -              | -               | -                  | -                | -             | N/A              | Undet.        | 814                              |
| 11     | VZV               | qPCR                  | 4.1x10 <sup>2</sup>  | -              | -               | -                  | -                | -             | 0.1              | Undet.        | 218                              |
| 12     | EBV               | qPCR                  | 1.9x10 <sup>3</sup>  | 10             | 9               | 9                  | 8                | 9             | 2.5              | 0.8-1.1       | 181                              |
| 13     | VZV               | qPCR                  | 4.7x10 <sup>3</sup>  | 7              | 7               | 7                  | 7                | 7             | 4.5              | 0.7-0.8       | 219                              |
| 14     | EBV               | qPCR                  | 5.0 x10 <sup>1</sup> | -              | -               | -                  | -                | -             | 0.1              | Undet.        | 90                               |
| 15     | VZV               | qPCR                  | 2.9x10 <sup>3</sup>  | 15             | 15              | 15                 | 12               | 15            | 5.5              | 1.2-1.7       | 220                              |
| 16     | EBV               | qPCR                  | 9.1 x10 <sup>2</sup> | -              | -               | -                  | -                | -             | 0.2              | Undet.        | 164                              |
| 17     | Yeast sp.         | Cultivation/Filmarray | N/A                  | -              | -               | -                  | -                | -             | N/A              | Undet.        | 221                              |
| 18     | EBV               | qPCR                  | 1.9x10 <sup>3</sup>  | 81             | 85              | 82                 | 79               | 82            | 20.5             | 6.7-7.5       | 26                               |
| 19     | EBV               | qPCR                  | 3.7x10 <sup>2</sup>  | -              | -               | -                  | -                | -             | 0.6              | Undet.        | 253                              |
| 20     | EBV               | qPCR                  | 3.2x10 <sup>2</sup>  | 6              | 6               | 6                  | 6                | 6             | 2.5              | 0.4-0.5       | 44                               |
| 21     | EBV               | qPCR                  | 2.7x10 <sup>2</sup>  | 232            | 228             | 225                | 213              | 223           | 18.5             | 21.2-22.8     | 4                                |
| 22     | EBV               | qPCR                  | 1.6x10 <sup>2</sup>  | 11             | 10              | 11                 | 11               | 11            | 0.3              | 1.0-1.2       | 148                              |
| 23     | EBV               | qPCR                  | 1.6x10 <sup>2</sup>  | -              | -               | -                  | -                | -             | N/A              | Undet.        | <4                               |
| 24     | EBV               | qPCR                  | 8.1 x10 <sup>1</sup> | -              | -               | -                  | -                | -             | 0.6              | Undet.        | 31                               |
| 25     | EBV               | qPCR                  | 5.0 x10 <sup>1</sup> | -              | 1               | 1                  | -                | 1             | 0.99             | 0-0.1         | 14                               |
| 26     | EBV               | qPCR                  | 5.0 x10 <sup>1</sup> | 8              | 8               | 8                  | 8                | 9             | 1.5              | 0.7-0.8       | 9                                |

226 Reads from each classifier from verified pathogen. Calculated reads in accordance with the presented algorithm. N/A: leukocyte count  
 227 missing for sample 4 and 5, leukocyte count for sample 18 is below reference value, calculation is not applicable for bacteria, fungi and  
 228 RNA virus. 16S rRNA: 16S rRNA gene Sanger sequencing, HSV1: Herpes simplex virus 1, VZV: Varicella Zoster virus, JCV: JC polyomavirus,  
 229 EBV: Epstein-Barr virus

## 230 **False positive pathogens**

231 The diversity of viral species detected in metagenomic sequencing libraries were relatively  
232 low and recurrent. PaRCA, Kraken2, Centrifuge and CosmosID identified 2-31, 5-13, 17-96  
233 and 0-4 viral species in each sample respectively (Figure 2a, Additional Table 5). Many of the  
234 most abundant viral species identified were found in multiple samples (Figure 3). Two  
235 samples (4 and 13) contained human virus which were not detected in multiple samples and  
236 not a previously confirmed pathogen (see below).

237           The non-pathogen/EBV viral reads were either of human origin, misclassified or  
238 contaminations. Human endogenous retrovirus K was identified in all samples, except for the  
239 water control, which was expected as the reads originates from the human genome (Figure 3  
240 bottom, Additional Table 5). Another ubiquitously detected virus was the BeAN 58058 virus,  
241 which was detected in all samples, except for the water control. An additional BLAST  
242 examination identified these hits as human reads. Low levels of phage sequences known to  
243 infect bacteria from the *Enterobacterales* order were detected in a few samples and in the  
244 water control, most likely derived from bacteria purified enzymes used in the various steps of  
245 library preparation. A conspicuous pseudomonas phage contaminant in sample 4, 5 and the  
246 water control are likely derived from a bacterial contaminant at one of the sequencing sites.  
247 Streptococcus phage species were detected in sample 6, from a patient with *S. pneumoniae*  
248 meningitis. Importantly, the most prominent viral species identified in patient samples were  
249 also present in the cell controls at similar levels and displayed a similar sequence identity and  
250 could therefore be discarded as a pathogen.

251           Compared with the relatively few viral agents detected by the classifiers,  
252 bacterial species were abundant; 61-712 bacterial species were identified using PaRCA, 370-  
253 1408 in Kraken2, 845-2826 in Centrifuge and 0-14 in CosmosID (Figure 2b). Two samples  
254 originated from patients with a known *S. pneumoniae* meningitis (sample 6 and 7) and

255 bacteria were detected at 69,088 ppm and 803 ppm respectively (PaRCA). With the omission  
256 of the positive samples 6 and 7, trace levels (3.4-18.2 ppm) of *S. pneumoniae* was  
257 ubiquitously detected in all samples. A known environmental contamination of *Pseudomonas*  
258 was detected in the majority of the samples. In two samples (4 and 5) *Pseudomonas*  
259 constituted 389,480 ppm (39%) and 590,195 ppm (59%) of the entire sequencing library  
260 respectively, while the prevalence in other samples were lower 6.6-75,279 ppm (0.0007-  
261 7.5%). A large fraction of the detected bacteria are still left when using previously suggested  
262 fixed cut-off at 100 ppm (0.01%) (Figure 2) and unlike the virus species the  
263 contaminants/misclassifications cannot be entirely removed using the control samples.  
264 However, when further applying an additional filter of comparison of the detected bacterial  
265 species between the three classifiers (PaRCA, Kraken2 and Centrifuge) only the known  
266 pathogen (*S. pneumoniae*) or environmental contaminants (*Pseudomonas* and *Escherichia*  
267 *coli*) was left. Similarly no eukaryotic species were found in all three classifiers.

268           Considering the ubiquitous presence of viral misclassifications and  
269 contaminants in samples as well as controls, a viral pathogen is easily identifiable, but require  
270 additional analyses including read distribution and BLAST analysis, for verification in a  
271 clinical setting (discussed below). In contrast, the large number of bacterial species identified  
272 pose a bioinformatic challenge as the bacterial sequence can be derived from kit  
273 contaminants, lab environment or bioinformatic misclassifications which obscure the  
274 pathogen reads. As with the virus hits, removal of bacterial contaminants using cell controls  
275 can efficiently remove the majority of species, but additional filters are required (Figure 4).

276

## 277 **Controls**

278 Two types of controls, water and cell control, were tested for their ability to mirror the  
279 bioinformatic missclassifications and contaminations observed in samples. In the water

280 control the dataset consisted of 99.6% bacterial sequences and 0.06% viral sequences  
281 (Additional Table 5). The cell controls originating from EBV-transformed cancer cells had a  
282 composition more similar to the samples with 99.2-99.4% human sequences. The number of  
283 viral and bacterial strains detected in the water control was 12 and 568 respectively. In  
284 contrast the cell controls contain sequences ranging from 3-4 viral and 61-177 bacterial  
285 strains.

286           The viral strains in the water control were mainly of phage origin. In contrast the  
287 viral strains detected in the cell controls were similar to the CSF samples, mainly Human  
288 endogenous retrovirus K and BeAN 58058 virus. Both cell lines originate from EBV-  
289 transformed cancer cells and harbours EBV DNA. The ppm-values of each cell line between  
290 sequencing runs was reproducible and no significant difference was found between the  
291 classifiers (Additional Figure 5, Additional Table 6).

292           In the water control, 98% of the sequencing library consisted of reads from  
293 *Pseudomonas* and the second most abundant bacterial strain found was *Escherichia coli*  
294 (0.1%), which is to be expected as most enzymes are produced in this bacterial system. In  
295 contrast, none of the bacterial strains in the cell controls constituted more than 0.1% of the  
296 sequencing library.

297 Thus, the water control efficiently amplified the environmental and kit contaminants, but in  
298 contrast to the cell control did not find human misclassifications. Also, since the water control  
299 consist entirely of contaminants, the absolute or proportionate content did not allow for a  
300 direct comparison with the patient samples. The cell control allowed for direct quantitative and  
301 qualitative subtraction of the majority of contaminants and putative pathogens were identified.

302

### 303 **Unexpected virus findings**

304 In sample 2 and 3 we identified 29-34 EBV reads in both samples in all classifiers (Additional  
305 Table 5). The reads were dispersed throughout the genome and displayed minor sequence  
306 variability with the reference genome in accordance with previous EBV findings (Additional  
307 Figure 6a-b). Due to the limited sample volume we were unable to verify and quantify this  
308 finding using qPCR.

309 In sample 4 we identified three viruses which were unexpected, mastadenovirus,  
310 papillomavirus and torque teno virus (Additional Figure 6c-e). PaRCA identified 32 reads  
311 matching human mastadenovirus C (HAC), Kraken2 32 reads, Centrifuge 30 reads and  
312 CosmosID did not report any HAC sequences. The majority of reads, 25 out of 32 where 198  
313 bp long, 5 reads where shorter and 2 were longer. BLAST-analysis showed that all reads  
314 shared the same 3'-end. Four reads had mismatches in comparison with reference sequence.  
315 Considering the size and distribution of the reads our findings are most likely a laboratory  
316 amplicon contamination. Human papillomavirus (HPV) reads were detected in PaRCA (12  
317 reads), Kraken2 (2 reads), but not by Centrifuge and CosmosID. Ten of the 12 reads were 105  
318 bp long and the remaining two, 104 bp and 106 bp respectively. All reads aligned to the 3'-  
319 end of the virus genome in the L1 gene. Examination of BLAST results showed a high  
320 similarity with HPV98 with a one or two base-pair mismatch. As above, considering the size  
321 and distribution of the reads our findings were most likely a laboratory amplicon  
322 contamination. CosmosID has an inbuilt function to filter out hits that are considered to be  
323 amplicons, therefore the software did not report these reads. Different strains of  
324 Anellovirus/Torque teno virus (TTV) were detected in the classifiers. PaRCA identified 75  
325 reads, Kraken2 25 reads, Centrifuge 55 reads, while CosmosID did not detect any TTV reads.  
326 Five distinct consensus reads/contigs were formed from the 75 reads identified in PaRCA.  
327 Thirty-one reads formed a consensus reads of 196bp. BLAST analysis of this read displayed a

328 97% identity with TTV14, but only for 91bp of the fragment. The remaining parts of the  
329 contig did not show any alignment with any viral species. The origin of this read is therefore  
330 unknown. BLAST analysis of the remaining 4 reads/contigs showed alignment (>95% query  
331 cover and identity) to an Anellovirus isolate previously identified in metagenomics. The  
332 alignment showed an unusual coverage of the 5'-end of the genome and all the reads were  
333 aligned to the first half of the genome. The reason for this unusual coverage is unknown, but  
334 considering that TTV is widely detected in metagenomic sequencing and the multiple reads  
335 aligning to a clinical isolate it is probable that these four contigs/reads originate from the  
336 patient sample.

337           In sample 13, we detected 10 reads corresponding to hepatitis C virus (HCV) in  
338 PaRCA. Kraken2, Centrifuge and CosmosID detected 5, 6 and 6 reads respectively. The 10  
339 reads were concentrated to the 5'-end of the genome, but spread within the initial half of the  
340 genome (Additional Figure 6f). An analysis of the BLAST results showed alignment with  
341 HCV genotype 1. Synonymous mutations were found in multiple reads as well as gaps. Two  
342 reads had a fusion between sequences from different regions of the HCV genome. The  
343 sequence diversity indicates that the virus is from a patient, but the frameshift and fusion  
344 reads indicates that they are of an artificial origin. Also, the patient had undergone HCV  
345 serology analysis which was negative. Finally, considering that HCV is a RNA virus this  
346 finding is most likely a laboratory amplicon contamination.

347

## 348 **Discussion**

349 In this study we subjected 21 CSF samples from patients with suspected or confirmed CNS  
350 infection to metagenomic DNA sequencing. Pathogen detection accuracy and efficiency was  
351 evaluated using five bioinformatic tools. Using 12 samples with minute levels of EBV we  
352 concluded that the sensitivity of detection was mainly affected by leukocyte content in the

353 samples and to lesser degree environmental contamination. Bioinformatic classifiers were  
354 essentially equally efficient in terms of sensitivity, but produced vastly different number of  
355 false positive hits, which inhibited efficient clinical pathogen identification. The removal of  
356 these false positive hits originating from contaminants and bioinformatics classifications were  
357 alleviated by using a EBV-containing cell control which served as a positive as well as a  
358 negative control. A number of criteria have been suggested for how to identify a causative  
359 agent in clinical samples e.g. by calculating the fraction of pathogen reads and/or an absolute  
360 number of reads. However, using these methods the majority of samples used in this study  
361 would be considered negative and/or contain a large number of agents which would be  
362 considered falsely positive dependent on the choice of classifier. The lower detection limit  
363 could be generalized and compared between studies/laboratories if the leukocyte count was  
364 provided. In a similar manner, a general quantification of viral content using ppm is an  
365 efficient reference point for comparison between studies [21, 22]. Furthermore, it is evident  
366 that local contaminants greatly impact the sequencing library constitution. Therefore, it is  
367 necessary that findings in negative controls from each study is presented in its entirety. Nine  
368 CSF-samples were identified at the clinic to only contain EBV, and we did not identify any  
369 additional pathogen, confirming the results from the clinic. Importantly, using our algorithm a  
370 lower detection limit could be determined for pathogens. An alternative to metagenomic  
371 sequencing is removal of the dominating host background using various methods including  
372 centrifugation and nuclease treatment [23, 24]. However, this will deplete the majority of  
373 nucleic acid and only minute amounts of nucleic acid will be left, which complicates the  
374 library preparation. Sensitivity would also be reduced, especially for intracellular virus, and  
375 bacteria which might precipitate if centrifugation is used. Likewise the specificity would be  
376 impaired by the overwhelming number of environmental contaminants as seen in our water  
377 control.



378 Our bioinformatic classifier PaRCA, which uses a combination of single reads  
379 alignment and assemblies was able to detect more reads from HAC, HPV, TTV and HCV, but  
380 failed to detect the single EBV read in sample 20. Bioinformatic classifiers for clinical  
381 practice should not only quantify the pathogen reads, but also provide information of read  
382 distribution, sequence diversity and subtraction of environmental contaminants and  
383 bioinformatic misclassifications, facilitating pathogen detection as shown in this study. Novel  
384 pathogens will also require classifiers to detect diverse sequences, as well as enable  
385 investigation of sequences which might not classify completely to a genus. Our finding of a  
386 novel TTV strain shows that there is a large difference between bioinformatics classifiers  
387 ability to identify divergent sequences.

388 In this study we have used archived material, which impair a proper RNA  
389 analysis due to degradation. Future studies using fresh CSF-samples where RNA integrity and  
390 quantity is measured may provide similar guidelines for RNA pathogen detection. We only  
391 included two verified bacterial CSF-samples in this study, one which was detected by  
392 culturing and 16S rRNA gene sequencing, and the second one detected by 16S rRNA gene  
393 sequencing. A limit of using metagenomic sequencing of CSF from bacterial meningitis  
394 patients is the high levels of leukocytes, but this may be compensated by the higher amount of  
395 bacterial nucleic acid compared with viral genomes. Here, we applied a fraction cutoff for  
396 bacterial findings (>0.01%) in order to decrease the amount of false positive bacterial species  
397 findings. This cutoff value should not be considered fixed and future studies with larger  
398 bacterial cohort would provide additional guidelines for bacterial species identification.

399

## 400 **Conclusions**

401 We suggest that prior to clinical metagenomic DNA sequencing, an estimation of sequencing  
402 depth is made by adjusting it to the leukocyte content in the sample. Also, a pathogen-

403 containing cell control sequenced at the same depth should be included in the same  
404 sequencing run in order to generate the same type of reproducible background. Bioinformatic  
405 processing should include a comparison between the pathogens detected in the cell control  
406 and the sample as well as between multiple classifiers. Further candidate pathogens reads  
407 should be confirmed by using BLAST and mapped against a reference genome to identify  
408 read distribution and sequence diversity. A comprehensive evaluation including a theoretical  
409 estimation on sensitivity of the metagenomics test as well as other clinical microbiological  
410 assays e.g. serology and PCR should assist the clinician in interpreting the final results.

411

## 412 **Methods**

### 413 **Sample collection**

414 Included in this retrospective study were cerebrospinal fluid samples from patients with CNS  
415 symptoms of infection, in which the Department of Clinical Microbiology at Sahlgrenska  
416 University Hospital or the The Public Health Agency of Sweden previously had verified the  
417 infectious agent during 2015-2017. The sample cohort was chosen to include a variety of  
418 microorganisms (DNA/RNA virus, bacteria or fungi) with varying concentration of the  
419 pathogens as determined by confirmatory testing using qPCR, cultures, 16S rRNA gene  
420 Sanger sequencing or FilmArray (Additional Methods). The samples were stored at -20°C  
421 after clinical testing. The cell lines P3HR1 (HTB-62, American Type Culture Collection,  
422 ATCC, USA) and Namalwa (CRL-1432, American Type Culture Collection, ATCC, USA),  
423 were used as combined negative controls as well as positive controls, due to its inherent EBV  
424 genome. The controls were processed in parallel with the patient samples during all the  
425 laboratory steps.

426

427 **Sample processing**

428 For samples processed at the Department of Clinical Microbiology at Sahlgrenska University  
429 Hospital, total nucleic acid was extracted from 400 µl of cerebrospinal fluid using the MagNA  
430 Pure Compact Nucleic Acid Isolation Kit I (Roche Diagnostics, Indianapolis, IN, USA) on the  
431 MagNA Pure compact automated extractor. For samples processed at The Public Health  
432 Agency of Sweden, total nucleic acid was extracted from 200 µl of cerebrospinal fluid sample  
433 using the MagDEA® Dx SV (Precision System Science Co Ltd, Matsudo-city, Chiba, Japan)  
434 on the magLEAD® 12gC automated extractor (Precision System Science Co Ltd). DNA  
435 concentrations were determined using the Qubit Fluorometer (Thermo Fisher Scientific,  
436 Waltham, MA, USA) using the dsDNA HS Assay Kit (Thermo Fisher).

437

438 **Library preparation and sequencing**

439 DNA libraries were prepared according to the modified protocol for metagenomic samples,  
440 developed at the Public Health Agency of Sweden, using the Ion Xpress Plus Fragment  
441 Library Kit (Thermo Fisher) on the AB Library Builder System (Thermo Fisher). Samples  
442 were fragmented to 200 bp, followed by ligation of Ion P1 Adapter as well as Ion Xpress  
443 Barcode adapters. The protocol was adjusted to suit low-input samples (<50 ng DNA) by  
444 using a reduced volume of P1 adapter and barcodes (0.5 µl). The libraries were amplified,  
445 selecting the number of amplification cycles according to the sample input concentration,  
446 varying between 14 to 20 cycles. Amplified libraries were size selected choosing an optimal  
447 size range for each individual sample to ensure removal of small-sized PCR concatemers,  
448 varying between 100 to 320 bp (including adapters). Size selection was performed using the  
449 Pippin Prep platform (Sage Science, Beverly, MA, USA) with 2 % Dye free Agarose Gel  
450 Cassette. Following visualization and an estimation of the concentration using the High  
451 Sensitivity D1000 DNA Kit on the Agilent 2200 TapeStation system (Agilent Technologies,

452 CA, USA), the samples were pooled according to concentration. Subsequently, libraries were  
453 purified using Agencourt AMPure XP (Beckman Coulter, Brea, CA, USA). Finally, libraries  
454 were quantified using qPCR with the Ion Library TaqMan Quantitation Kit (Thermo Fisher)  
455 and the size estimated using High Sensitivity D1000 DNA Kit on Agilent 2200 TapeStation  
456 system (Agilent Technologies). For template preparation, libraries were pooled to a final  
457 concentration of 50 pM, if obtainable. For libraries with lower concentration than 50 pM,  
458 libraries were pooled to the available concentration. Thereafter, the Ion Chef Platform was  
459 used to ligate the libraries onto spheres using the Ion 540 Kit-Chef (Thermo Fisher).  
460 Following clonal amplification, libraries were loaded onto Ion 540 Chip and sequencing was  
461 performed on the S5 System (XL, Prime; Thermo Fisher) according to the manufacturer's  
462 protocol for 200 bp read length.

463

#### 464 **Bioinformatic analysis**

##### 465 **Quality Control**

466 BAM-files were converted into fastq files using the Torrent Suite Software provided for Ion  
467 S5 system. Reads were processed with FASTX toolkit [25] to fasta files. Fastqc was used to  
468 identify low-quality reads. Sequences were then subjected to the individual pipelines  
469 described below.

470

##### 471 **Pathogen detection for Research and Clinical Applications (PaRCA)**

472 Databases were created using built-in tools in Kraken2 and Kaiju. Briefly, databases,  
473 corresponding to bacteria, viruses and eukaryotes were created at DNA, RNA and protein  
474 level resulting in nine total k-mer databases. The viral databases were comprised of all viral  
475 data in GenBank, the bacterial database consisted of the full Progenomes data [26] and  
476 eukaryotic databases were composed of the GenBank data for vertebrates, parasites and fungi.

477 After download, the Progenomes database was continuously updated using scripts to reflect  
478 changes within the NCBI taxonomy. Reads were initially trimmed at both directions using  
479 BBDuk (BBMap 37.50) using an entropy mask of 0.9, trim quality of 16 and a minimum  
480 length of 40. Reads were corrected using Fiona (0.2.9) with id=3 for substitution errors.  
481 Reads were classified using Kraken2 and Kaiju by using individual databases. Kraken2 results  
482 were filtered using the kraken-filter with a threshold of 0.15 for eukaryotes and 0.05 for  
483 viruses and bacteria (a higher threshold indicates higher stringency). Thresholds for Kaiju:  
484 score and minimum matches were set to 85.20 for eukaryotes, 80.18 for bacteria and 75.15 for  
485 viruses.

486 After initial classification and filtering, Kraken2 results were individually compared and reads  
487 with hits in multiple databases were evaluated based on k-mer score with the highest scoring  
488 match being retained for further downstream analysis. Kaiju scores were internally compared  
489 and the hit with the longest protein alignment was preserved. Reads with both Kraken2 and  
490 Kaiju hits were then compared and the lowest common ancestor of the two results was  
491 selected using mergeOutputs with “-c lowest” from the Kaiju package. Reads where the  
492 lowest common ancestor was a species designation were directly counted and saved while  
493 reads with a higher lowest common ancestor were further processed in the pipeline. Reads  
494 only classified by a single k-mer classifier were labelled as “singletons” and further  
495 processed.

496 Reads were ordered by taxonomic ID, which then were regressed through the  
497 taxonomic tree until either a genus-level or kingdom-level was reached. Reads without genus-  
498 level information or reads with a classification above genus level were stored separately for  
499 further analysis. After ordering into genus, all taxonomic IDs corresponding to a member of  
500 the genus were automatically downloaded from NCBI and corresponding accession identifiers  
501 were parsed from the NCBI accession dump file. Accession identifiers were then used to

502 create a slice of the BLAST nt-database for that specific genus. Reads classified as belonging  
503 to the order “primates” was not processed further and received the taxonomic ID 9606 (Homo  
504 Sapiens).

505 Reads were analyzed in BLAST within the genus using a threshold of an e-value  
506 of  $10^{-3}$  and the ten best hits were then retained. The ten results per read were parsed and the  
507 bit-score per taxon in the hits were aggregated. The taxon with the highest aggregate bit score  
508 was then selected as the putative taxon ID for the read. After taxon identification, results were  
509 merged and regressed in order to identify the species level classification of the putative taxon.  
510 If the kingdom level was reached before a species identification was found, the original taxon  
511 identifier was used in its place. Finally, any reads that were not successfully classified within  
512 a genus in the BLAST database creation step were collected and subjected to BLAST against  
513 the full NT-database with an e-value of  $>10^{-5}$  and a minimum query coverage of 20% as  
514 threshold, again the ten best hits were preserved. The results from both BLAST analyses were  
515 aggregated based on bit score and the resulting taxon ID regressed to species level if possible.

516 Classified reads were collected and presented using a krona-graph and tables in  
517 an html format. Tables were reorderable on name, taxonomic id and read count. Tables were  
518 also filterable, including wildcard functionality. FASTQ-files containing reads classified to an  
519 individual species and aggregates corresponding to kingdoms and unclassified reads were  
520 directly downloadable.

521

## 522 **Kraken2**

523 We used Kraken2 with a dustmasker included in the package.

524

## 525 **Centrifuge**

526 We subjected our samples to Centrifuge with the inbuilt quality control and repeatmasker  
527 based on dustmasking from NCBI tools. Briefly, the dustmasker converts the low-quality  
528 regions into N's so the aligner skips aligning these sequences [16]. In order to obtain reads  
529 from all pathogens included in this study, the total of both leaf and genus levels were  
530 incorporated from the Centrifuge reports, thus leading to higher amounts of total classified  
531 reads, however, since not all species were converted into the ETE3 toolkit, and some stops at  
532 genus level, this does not affect final results of classified pathogens.

533

#### 534 **CosmosID**

535 Unassembled sequencing reads were directly analyzed using the commercially available  
536 genomic platform CosmosID to achieve identification of microbes at species level [27]. Each  
537 uploaded sample was searched and cleared from host sequences by the platform prior to  
538 analysis. CosmosID automatically filters out phages and amplicon-originated sequences.

539

#### 540 **BLAST**

541 BLAST analysis was performed with reference genomes for the pathogens. The cutoff was set  
542 to  $\geq 95\%$  sequence identity and an e-value of  $\leq 10^{-3}$ . Following standard steps for pre-  
543 processing reads, a BLAST search was performed with reads set as subjects and reference  
544 genomes set as queries. Reference genomes used were NC\_001806 (HSV1), NC\_001348  
545 (VZV), NC\_00196 (JCV), NC\_003098 (*S. pneumoniae*), NC\_007605 (EBV), NC\_001405  
546 (Human Mastadenovirus C; MAVC), FM\_955837.2 (Human Papillomavirus 98; HPV98),  
547 MH\_649255.1 (Anellovirus ), and NC\_004102.1 (HCV).

548

#### 549 **Calculations and statistical analysis**

550 CLC genomics workbench (Ver. 11, Qiagen) was used to perform and plot coverage analysis.

551 Classified sequences from Kraken2 and Centrifuge were visualized using Pavian [28]. Ratio

552 between sample ppm and control ppm were calculated, where a ratio  $\leq 10$  were considered a

553 contamination.

554 GraphPad Prism Ver. 7.0c was utilized to perform statistical analysis. Kruskal-Wallis test with

555 Dunn's multiple comparison tests was applied to compare reproducibility through pipelines.

556 A  $p$ -value  $\leq 0.05$  were considered significant.

557

558



559 **References**

- 560 1. Granerod J, Ambrose HE, Davies NW, et al. Causes of encephalitis and differences in their  
561 clinical presentations in England: a multicentre, population-based prospective study. *Lancet*  
562 *Infect Dis.* 2010;10(12):835-44.
- 563 2. Hong HL, Lee EM, Sung H, et al. Clinical features, outcomes, and cerebrospinal fluid  
564 findings in adult patients with central nervous system (CNS) infections caused by varicella-  
565 zoster virus: comparison with enterovirus CNS infections. *J Med Virol.* 2014;86(12):2049-54.
- 566 3. Okike IO, Ribeiro S, Ramsay ME, et al. Trends in bacterial, mycobacterial, and fungal  
567 meningitis in England and Wales 2004-11: an observational study. *Lancet Infect Dis.*  
568 2014;14(4):301-7.
- 569 4. Maeda E, Akahane M, Kiryu S, et al. Spectrum of Epstein-Barr virus-related diseases: a  
570 pictorial review. *Jpn J Radiol.* 2009;27(1):4-19.
- 571 5. Martelius T, Lappalainen M, Palomaki M, Anttila VJ. Clinical characteristics of patients  
572 with Epstein Barr virus in cerebrospinal fluid. *BMC Infect Dis.* 2011;11:281.
- 573 6. Siddiqi OK, Ghebremichael M, Dang X, et al. Molecular diagnosis of central nervous  
574 system opportunistic infections in HIV-infected Zambian adults. *Clin Infect Dis.*  
575 2014;58(12):1771-7.
- 576 7. Salzberg SL, Breitwieser FP, Kumar A, et al. Next-generation sequencing in  
577 neuropathologic diagnosis of infections of the nervous system. *Neurol Neuroimmunol*  
578 *Neuroinflamm.* 2016;3(4):e251.
- 579 8. Chiu CY, Miller SA. Clinical metagenomics. *Nat Rev Genet.* 2019;20(6):341-55.
- 580 9. Palacios G, Druce J, Du L, et al. A new arenavirus in a cluster of fatal transplant-associated  
581 diseases. *N Engl J Med.* 2008;358(10):991-8.
- 582 10. Wilson MR, Naccache SN, Samayoa E, et al. Actionable diagnosis of neuroleptospirosis  
583 by next-generation sequencing. *N Engl J Med.* 2014;370(25):2408-17.

- 584 11. Naccache SN, Peggs KS, Mattes FM, et al. Diagnosis of neuroinvasive astrovirus  
585 infection in an immunocompromised adult with encephalitis by unbiased next-generation  
586 sequencing. *Clin Infect Dis*. 2015;60(6):919-23.
- 587 12. Wilson MR, Sample HA, Zorn KC, et al. Clinical Metagenomic Sequencing for Diagnosis  
588 of Meningitis and Encephalitis. *N Engl J Med*. 2019;380(24):2327-40.
- 589 13. Gu W, Miller S, Chiu CY. Clinical Metagenomic Next-Generation Sequencing for  
590 Pathogen Detection. *Annu Rev Pathol*. 2019;14:319-38.
- 591 14. Strong MJ, Xu G, Morici L, et al. Microbial contamination in next generation sequencing:  
592 implications for sequence-based analysis of clinical samples. *PLoS Pathog*.  
593 2014;10(11):e1004437.
- 594 15. Zinter MS, Mayday MY, Ryckman KK, Jelliffe-Pawlowski LL, DeRisi JL. Towards  
595 precision quantification of contamination in metagenomic sequencing experiments.  
596 *Microbiome*. 2019;7(1):62.
- 597 16. Kim D, Song L, Breitwieser FP, Salzberg SL. Centrifuge: rapid and sensitive  
598 classification of metagenomic sequences. *Genome Res*. 2016;26(12):1721-9.
- 599 17. Wood DE, Salzberg SL. Kraken: ultrafast metagenomic sequence classification using  
600 exact alignments. *Genome Biol*. 2014;15(3):R46.
- 601 18. Kostic AD, Ojesina AI, Pedomallu CS, et al. PathSeq: software to identify or discover  
602 microbes by deep sequencing of human tissue. *Nat Biotechnol*. 2011;29(5):393-6.
- 603 19. Breitwieser FP, Lu J, Salzberg SL. A review of methods and databases for metagenomic  
604 classification and assembly. *Brief Bioinform*. 2019;20(4):1125-36.
- 605 20. Nooij S, Schmitz D, Vennema H, Kroneman A, Koopmans MPG. Overview of Virus  
606 Metagenomic Classification Methods and Their Biological Applications. *Front Microbiol*.  
607 2018;9:749.

- 608 21. Tang KW, Alaei-Mahabadi B, Samuelsson T, Lindh M, Larsson E. The landscape of viral  
609 expression and host gene fusion and adaptation in human cancer. *Nat Commun.* 2013;4:2513.
- 610 22. Tang KW, Larsson E. Tumour virology in the era of high-throughput genomics. *Philos*  
611 *Trans R Soc Lond B Biol Sci.* 2017;372(1732).
- 612 23. Song Y, Giske CG, Gille-Johnson P, et al. Nuclease-assisted suppression of human DNA  
613 background in sepsis. *PLoS One.* 2014;9(7):e103610.
- 614 24. Lewandowska DW, Zagordi O, Geissberger FD, et al. Optimization and validation of  
615 sample preparation for metagenomic sequencing of viruses in clinical samples. *Microbiome.*  
616 2017;5(1):94.
- 617 25. FASTX-Toolkit. [http://hannonlab.cshl.edu/fastx\\_toolkit/](http://hannonlab.cshl.edu/fastx_toolkit/) Accessed 18 May 2020.
- 618 26. Progenomes2. <http://progenomes.embl.de/>. Accessed 18 May 2020.
- 619 27. CosmosID. <http://www.cosmosid.com/> Accessed 18 May 2020.
- 620 28. Breitwieser FP, Salzberg SL. Pavian: Interactive analysis of metagenomics data for  
621 microbiome studies and pathogen identification. *Bioinformatics.* 2019.

622

## 623 **Declarations**

## 624 **Ethics approval and consent to participate**

625 The study design and methods were approved by the Regional ethical review board in  
626 Gothenburg (191-18).

## 627 **Availability of data and materials**

628 Will be available on the European Genome-phenome Archive upon publication.

## 629 **Competing interests**

630 Authors declare no competing interests.

631 **Funding**

632 This project was supported by funding from the Sahlgrenska University Hospital Fund C4A,  
633 FoU Laboratoriemedicin, the Konrad and Helfrid Johanssons Foundation, the Olle Engkvist  
634 foundation, the Långmanska foundation and the Wilhelm and Martina Lundgren foundation.

635 **Author contributions**

636 This study was designed by HEJ, MLK, SB and KWT. Cells were cultured by YT. Samples  
637 were selected by KWT, SB and DV. Metagenomic sequencing was performed by MLK, SB,  
638 and JO. PS, SA and SHM executed bioinformatic analysis. Calculations was done by JO, SA  
639 and KWT. DV and KWT provided clinical expertise. Manuscript was written by JO, SB, HEJ  
640 and KWT. Figures and tables was prepared by JO, YT and KWT. All authors read and  
641 approved the final manuscript.

642

643 **Acknowledgements**

644 We thank the Bioinformatics Core Facility at the Sahlgrenska Academy for bioinformatics  
645 analyses.

646

647

648 **Additional information**

649 **Additional table 1.** Clinical data (docx)

650 **Additional table 2.** Dataset species classification (docx)

651 **Additional table 3.** Pathogen detection by bioinformatic classifier (docx)

652 **Additional table 4.** Patient report with estimation of sensitivity for pathogens (xlsx)

653 **Additional table 5.** Species identified in bioinformatic classifiers (xlsx)

654 **Additional table 6.** Cell control reproducibility (docx)

655 **Additional method.** Description of clinical methodology used for comparison (docx)

656

657 **Additional figure 1.** Overview of the sample and bioinformatic processing (pdf)

658 DNA from cerebrospinal fluid specimens was extracted and followed by library construction

659 and sequencing. Datasets generated by the Ion S5 were processed by four different

660 bioinformatics classifiers to profile the microbiome. BLAST was used for verification.

661

662 **Additional figure 2.** Enterovirus samples (pdf)

663 Results of viral species detected in RNA sequencing datasets of sample 8 and sample 9 in

664 PaRCA.

665

666 **Additional figure 3.** Correlation between detected and calculated reads (pdf)

667 The reads detected by PaRCA correlated to the calculated reads using the algorithm,

668 Spearman Correlation coefficient,  $n=10$

669

670 **Additional figure 4.** Coverage density plot of microbial species in CSF samples (pdf)

671 Reads from samples not shown in main figure mapped to reference genomes of (a) VZV  
672 (NC\_001348), (b) JCV (NC\_00196), (c) *S. pneumoniae* (NC\_003098), (d, f) VZV  
673 (NC\_001348), and (e, g-j) EBV (NC\_007605) using CLC Genomics Workbench. Number of  
674 reads (y-axis) at each nucleotide position of the genome (x-axis) depicted in blue. Dark blue  
675 represents peak, bright blue average and light blue minimum coverage for respective section  
676 of the genome.

677

678 **Additional figure 5.** Cell control coverage density plot and reproducibility (pdf)

679 Coverage analysis of EBV reads detected in cell controls Namalwa (a) and P3HR1 (b)  
680 mapped to EBV reference genome (NC\_007605) using CLC Genomics Workbench. Number  
681 of reads (y-axis) at each nucleotide position of the genome (x-axis) depicted in blue. Dark  
682 blue represents peak, bright blue average and light blue minimum coverage for respective  
683 section of the genome. EBV reads shown as parts per million reads (ppm) in each of the cell  
684 line controls for each of the bioinformatic classifier (c), n=4 (Namalwa) or n=5 (P3HR1);  
685 Kruskal-Wallis test with Dunn's multiple comparisons show no significant difference  
686 between the pipelines.

687

688 **Additional figure 6.** Coverage analysis for unexpected findings (pdf)

689 Reads from samples with ambiguous findings mapped to reference genomes of EBV  
690 NC\_007605 (a-b), Human Mastadenovirus C (MAVC) NC\_001405 (c), Human  
691 Papillomavirus 98 (HPV98) FM\_955837.2 (d), Anellovirus MH\_649255.1 (e), and HCV  
692 NC\_004102.1 (f), using CLC Genomics Workbench.

693 **Figure Captions**

694 **Figure 1. Pathogen genome alignment**

695 Coverage density plot of sequencing reads from respective sample and control detected in  
696 PaRCA aligned to reference genomes of HSV1 (a), VZV (b), JCV (c), *S. pneumoniae* (d) and  
697 EBV (e-f). Number of reads (y-axis) at each nucleotide position of the genome (x-axis)  
698 depicted in blue. Dark blue represents peak, bright blue average and light blue minimum  
699 coverage for respective section of the genome.

700

701 **Figure 2. Detected pathogens in bioinformatic classifiers**

702 Number of viral (a) and bacterial species (b) classified in each of the samples and controls  
703 using the different bioinformatic classifiers. Dark blue bars shows number of total number of  
704 species classified, bright blue bars shows amount of bacterial species over the fraction cutoff  
705 ( $\geq 0.01\%$  of the dataset), light blue bars shows number of species not removed using controls.

706

707 **Figure 3. Viral species identified in datasets**

708 Heatmap showing the ten most abundant viral species in each sample detected using PaRCA.  
709 AcMNPV: Autographa californica multiple nucleopolyhedrovirus. Controls: P; P3HR1, N;  
710 Namalwa, W; water.

711

712 **Figure 4. Discerning microbial pathogens from contaminations and misclassifications**

713 Flowchart for identification of pathogens by removing false positive species. Virus  
714 contaminants can be removed by comparison of datasets with controls and manual  
715 examination of remaining viral reads. Phages can be disregarded as these virus do not infect  
716 human cells. Bacterial species require additional filters including a cutoff value and  
717 comparison between classifiers.

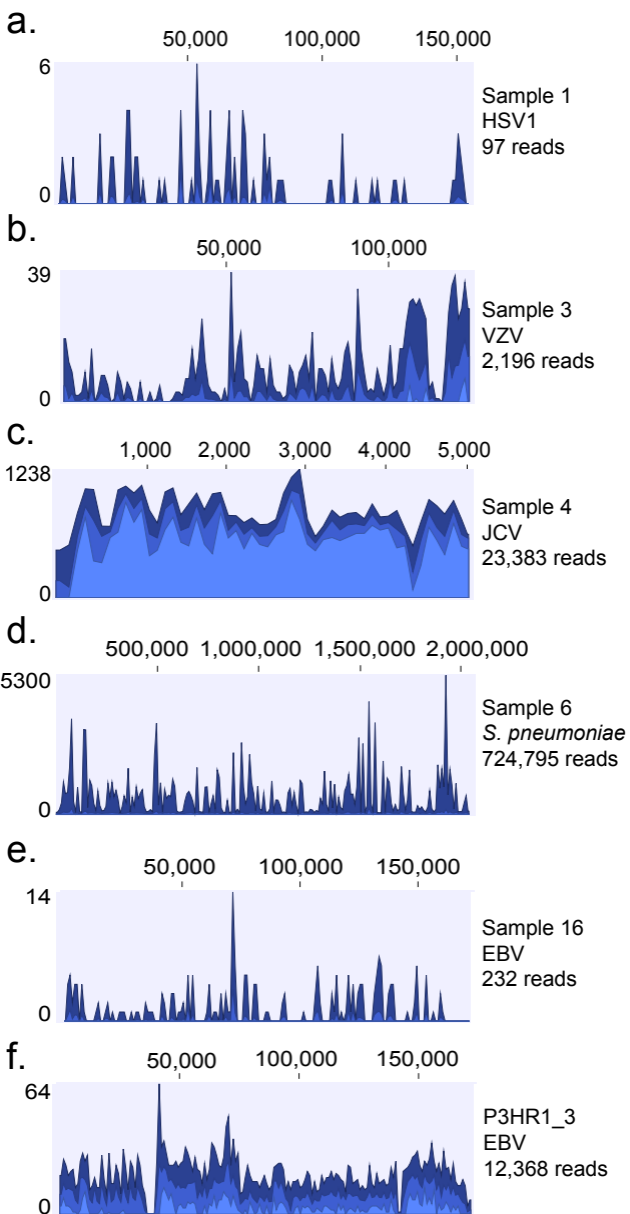



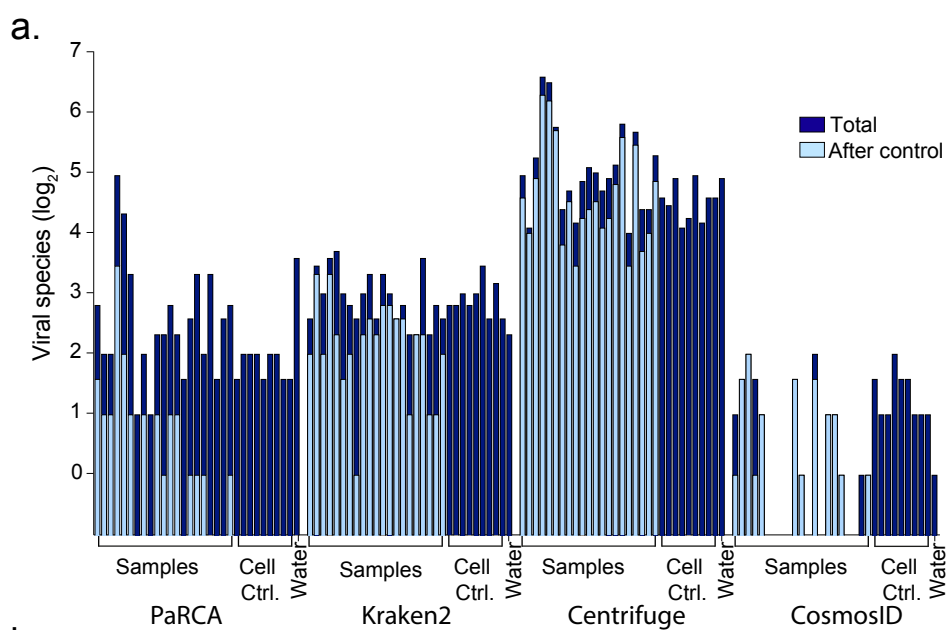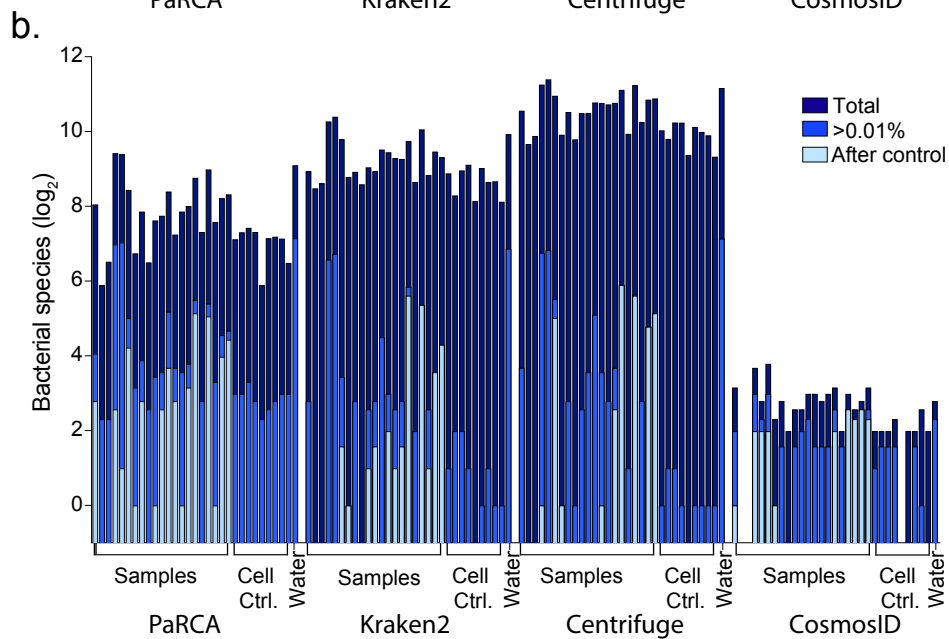



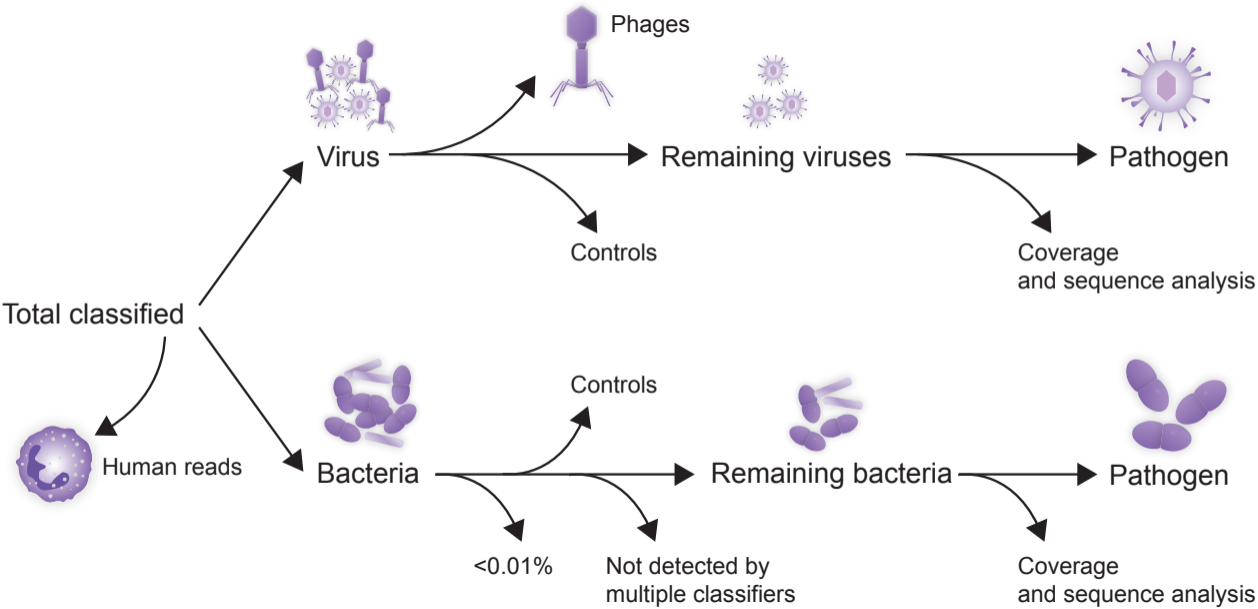

Source: https://www.biorxiv.org/content/10.1101/2020.06.25.170423v1.full.pdf
